# Supplementary material for: Exploring the relation between the oligomeric structure and membrane damage by a study on rat islet amyloid polypeptide
Source: Royal Society of Chemistry journal article supplement (doi:10.1039/c7cp06468c), 2018-01-01
Supplement: c7cp06468c1.pdf [file c7cp06468c1.pdf]

## **Electronic Supplementary Information**

Exploring the relation between the oligomeric structure and membrane damage  
by a study on rat islet amyloid polypeptide

Tong Lu, Feihong Meng, Ying Wei, Yang Li, Chunyu Wang, Fei Li\*

State Key Laboratory of Supramolecular Structure and Materials, Jilin University,  
Changchun, P. R. China

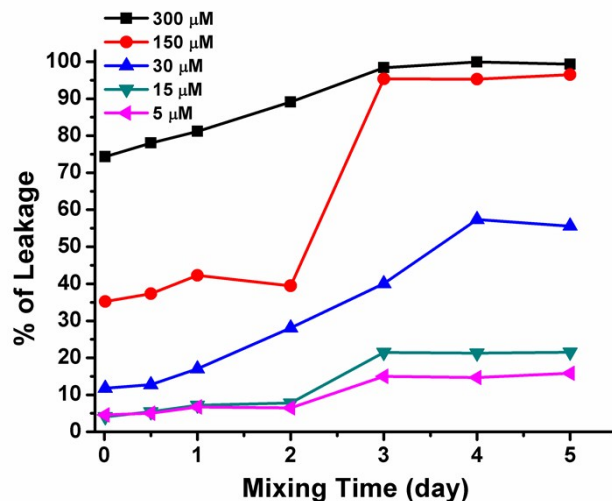

**Fig. S1** Dependences of calcein leakage of POPC:POPG 4:1 LUVs (total lipid concentration was 3 mM) in 20 mM Tris-HCl buffer containing 100 mM NaCl at pH 7.4 in the presence of one-hour-sonication rIAPP sample  $O_{1h-s}$  at various concentrations of rIAPP.

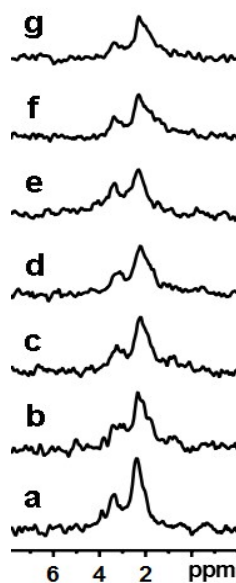

**Fig. S2**  $^{31}\text{P}$ -NMR spectra of POPC:POPG 4:1 SUVs obtained before and after the addition of one-hour-sonication rIAPP sample  $O_{1h-s}$  at a L:P of 300:1 (3 mM lipid: 10  $\mu\text{M}$  peptide): (a) SUVs alone; (b-g) SUVs mixed with  $O_{1h-s}$  at mixing time of 0, 1, 2, 3, 4 and 5 days, respectively. The spectra were recorded in 20 mM Tris-HCl buffer containing 100 mM NaCl at pH 7.4, 25°C.

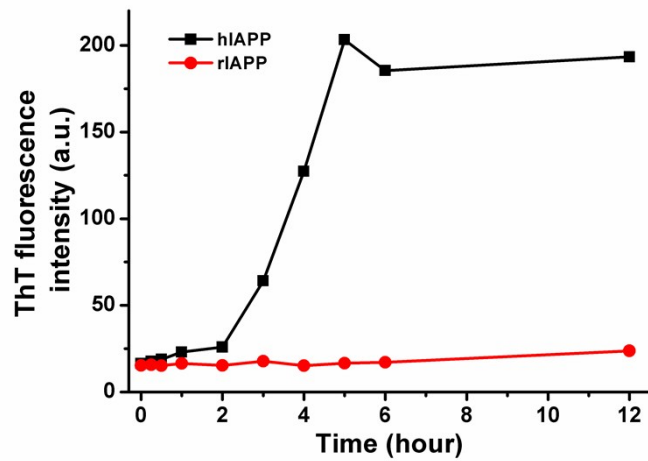

**Fig. S3** Time-dependent ThT fluorescence curves for hIAPP (30  $\mu$ M) and rIAPP (30  $\mu$ M) in 25 mM phosphate buffer at pH 7.4 with 25 mM NaCl.

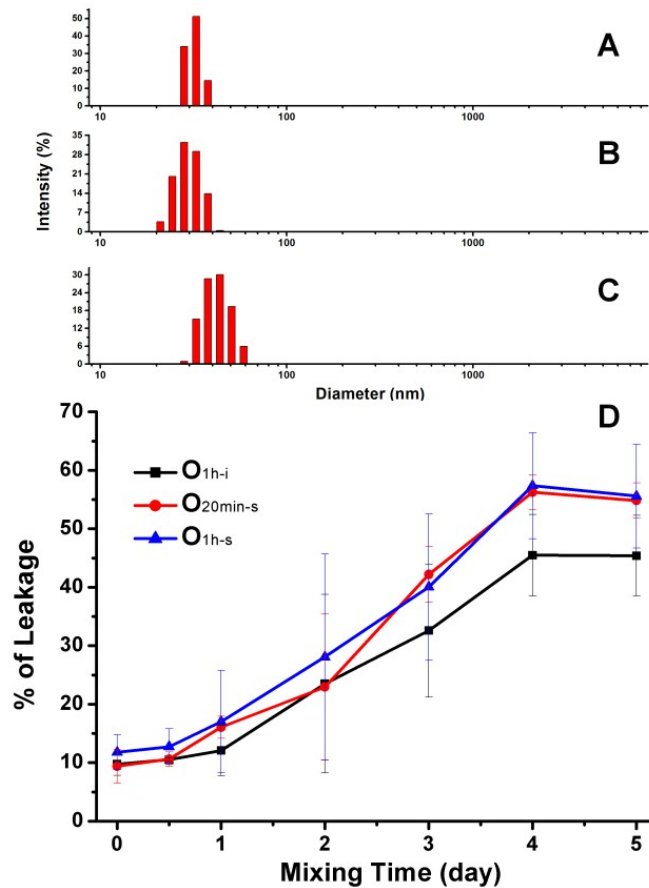

**Fig. S4** The DLS results of rIAPP samples treated via one-hour-incubation  $O_{1h-i}$  (A), twenty-minute-sonication  $O_{20min-s}$  (B) and one-hour-sonication  $O_{1h-s}$  (C) in Milli-Q water at pH 4.6 as well as the leaking results of POPC/POPG 4:1 LUVs incubated with the three peptide samples (D) in 20 mM Tris-HCl buffer with 100 mM NaCl at pH 7.4.

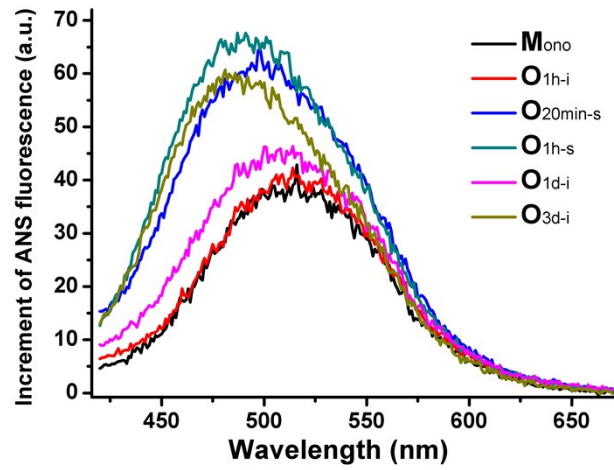

**Fig. S5** Increment of ANS fluorescence upon binding with various rIAPP samples recorded in 25 mM phosphate buffer containing 25 mM NaCl at pH 7.4.
